# Supplementary material for: Effects of Different Dietary β-Glucan Levels on Antioxidant Capacity and Immunity, Gut Microbiota and Transcriptome Responses of White Shrimp (Litopenaeus vannamei) under Low Salinity
Source: MDPI journal article supplement (doi:10.3390/antiox11112282), 2022-11-18
Supplement: s1 [file s1]

**Table S1.** Regression analysis of the gut microbiota composition of *L. vannamei* fed different dietary  $\beta$ -glucan levels

| Alpha diversity   | Regression analysis (n = 4) <sup>a</sup> |                | phylum level     | Regression analysis (n = 4) |                | genus level     | Regression analysis (n = 4) |                |
|-------------------|------------------------------------------|----------------|------------------|-----------------------------|----------------|-----------------|-----------------------------|----------------|
|                   | SOP                                      |                |                  | SOP                         |                |                 | SOP                         |                |
|                   | Adj. R <sup>2</sup>                      | <i>p</i> Value |                  | Adj. R <sup>2</sup>         | <i>p</i> Value |                 | Adj. R <sup>2</sup>         | <i>p</i> Value |
| Chao1             | 0.126                                    | 0.318          | Proteobacteria   | 0.1678                      | 0.21           | Rhodobacterales | 0.1752                      | 0.194          |
| ACE               | 0.1279                                   | 0.312          | Firmicutes       | 0.1869                      | 0.172          | Alteromonadales | 0.087                       | 0.458          |
| Shannon           | 0.168                                    | 0.209          | Actinobacteriota | 0.2515                      | 0.085          | Pseudomonadales | 0.047                       | 0.664          |
| Observed_ species | 0.1637                                   | 0.219          | Bacteroidota     | 0.1487                      | 0.254          | Lactobacillus   | 0.3028                      | 0.047          |

Note: <sup>a</sup> SOP, second-order polynomial; Adj. R<sup>2</sup>, adjusted R square.

**Table S2.** Shared differentially expressed genes between the control, 0.05%, 0.1%, 0.2% and 0.4% groups

| Gene ID               | NR Database comments                                   | 0.05%/Control      |               | 0.1%/Control       |               | 0.2%/Control       |               | 0.4%/Control       |               |
|-----------------------|--------------------------------------------------------|--------------------|---------------|--------------------|---------------|--------------------|---------------|--------------------|---------------|
|                       |                                                        | Log2FoldC<br>hange | Regulat<br>ed | Log2FoldC<br>hange | Regulat<br>ed | Log2FoldC<br>hange | Regulat<br>ed | Log2FoldC<br>hange | Regulate<br>d |
| TRINITY_DN13281_c0_g1 | phenoloxidase 3-like                                   | 2.59               | UP            | 4.31               | UP            | 4.50               | UP            | 5.17               | UP            |
| TRINITY_DN1333_c0_g1  | Unknown                                                | -1.38              | DOWN          | -1.30              | DOWN          | -1.77              | DOWN          | -1.81              | DOWN          |
| TRINITY_DN1375_c0_g1  | hemocyte transglutaminase                              | 2.63               | UP            | 2.50               | UP            | 3.68               | UP            | 2.80               | UP            |
| TRINITY_DN14962_c0_g1 | BACE 1 [Penaeus vannamei]                              | 1.44               | UP            | 1.80               | UP            | 1.92               | UP            | 1.80               | UP            |
| TRINITY_DN16841_c0_g1 | putative trehalase isoform X1                          | 2.11               | UP            | 2.12               | UP            | 3.02               | UP            | 2.76               | UP            |
| TRINITY_DN18662_c0_g1 | C-Maf-inducing protein, partial                        | 1.24               | UP            | 1.30               | UP            | 2.01               | UP            | 1.83               | UP            |
| TRINITY_DN1932_c0_g1  | Na+/K+/2Cl- cotransporter [Penaeus monodon]            | 1.07               | UP            | 1.69               | UP            | 1.39               | UP            | 1.84               | UP            |
| TRINITY_DN22420_c0_g1 | uncharacterized protein LOC113811243                   | 3.99               | UP            | 4.23               | UP            | 5.58               | UP            | 6.13               | UP            |
| TRINITY_DN2282_c0_g1  | Unknown                                                | -2.49              | DOWN          | -2.94              | DOWN          | -2.13              | DOWN          | -2.68              | DOWN          |
| TRINITY_DN23062_c0_g6 | uncharacterized protein LOC113802105                   | 1.62               | UP            | 1.54               | UP            | 1.99               | UP            | 1.97               | UP            |
| TRINITY_DN2608_c2_g2  | Unknown                                                | -1.01              | DOWN          | -1.09              | DOWN          | -1.34              | DOWN          | -1.51              | DOWN          |
| TRINITY_DN2701_c0_g1  | protein FAM57A-like                                    | 2.45               | UP            | 2.04               | UP            | 2.06               | UP            | 2.60               | UP            |
| TRINITY_DN2958_c0_g1  | Unknown                                                | 2.89               | UP            | 3.87               | UP            | 4.27               | UP            | 4.06               | UP            |
| TRINITY_DN3380_c0_g2  | retinoid-inducible serine<br>carboxypeptidase-like     | 2.32               | UP            | 2.51               | UP            | 2.50               | UP            | 2.61               | UP            |
| TRINITY_DN3720_c0_g1  | basic proline-rich protein-like isoform<br>X1          | 2.01               | UP            | 2.02               | UP            | 2.43               | UP            | 2.03               | UP            |
| TRINITY_DN3972_c0_g1  | carbohydrate sulfotransferase 9-like                   | -2.54              | DOWN          | -2.10              | DOWN          | -1.84              | DOWN          | -1.64              | DOWN          |
| TRINITY_DN4411_c0_g1  | nose resistant to fluoxetine protein 6-like            | 2.60               | UP            | 2.95               | UP            | 2.80               | UP            | 3.83               | UP            |
| TRINITY_DN5511_c0_g1  | putative antimicrobial peptide                         | 3.53               | UP            | 5.13               | UP            | 5.36               | UP            | 5.55               | UP            |
| TRINITY_DN5673_c0_g1  | VICP1                                                  | 2.81               | UP            | 3.68               | UP            | 4.20               | UP            | 4.24               | UP            |
| TRINITY_DN567_c0_g1   | late cornified envelope-like proline-rich<br>protein 1 | 1.93               | UP            | 2.69               | UP            | 3.41               | UP            | 3.31               | UP            |
| TRINITY_DN5711_c0_g1  | Unknown                                                | -2.90              | DOWN          | -4.15              | DOWN          | -2.41              | DOWN          | -1.46              | DOWN          |
| TRINITY_DN581_c0_g1   | hypothetical protein C7M84_021358                      | 2.31               | UP            | 2.31               | UP            | 1.98               | UP            | 2.12               | UP            |

|                      |                                        |       |      |       |      |       |      |       |      |
|----------------------|----------------------------------------|-------|------|-------|------|-------|------|-------|------|
| TRINITY_DN6139_c0_g1 | Unknown                                | -1.75 | DOWN | -1.84 | DOWN | -1.91 | DOWN | -2.44 | DOWN |
|                      | serine/threonine-protein phosphatase 6 |       |      |       |      |       |      |       |      |
| TRINITY_DN7521_c0_g1 | regulatory                             | -4.12 | DOWN | -5.00 | DOWN | -3.63 | DOWN | -5.35 | DOWN |
|                      | ankyrin repeat subunit B-like          |       |      |       |      |       |      |       |      |
| TRINITY_DN7883_c0_g1 | protein kibra-like                     | 2.15  | UP   | 2.24  | UP   | 2.26  | UP   | 2.73  | UP   |
| TRINITY_DN8599_c0_g1 | T-box transcription factor TBX18-like  | 1.70  | UP   | 1.60  | UP   | 1.43  | UP   | 2.04  | UP   |
| TRINITY_DN980_c0_g1  | uncharacterized protein LOC113820017   | 1.66  | UP   | 1.58  | UP   | 2.23  | UP   | 1.60  | UP   |

---

Note: The multiple of difference is represented by log2FC, where FC is Fold change.

**Table S3.** KEGG pathway enrichment of the differentially expressed genes between Control, 0.05%, 0.1%, 0.2% and 0.4%

| KEGG                                                                  | KEGG ID  | Ratio | P value | DEGs ID                                                                                                                                                                          |
|-----------------------------------------------------------------------|----------|-------|---------|----------------------------------------------------------------------------------------------------------------------------------------------------------------------------------|
| 0.05%/Control                                                         |          |       |         |                                                                                                                                                                                  |
| Starch and sucrose metabolism                                         | map00500 | 8/85  | 0.000   | TRINITY_DN6325_c0_g1 TRINITY_DN6505_c1_g1 TRINITY_DN16841_c0_g1<br> TRINITY_DN209_c1_g1 TRINITY_DN12252_c0_g1 TRINITY_DN1721_c0_g1<br> TRINITY_DN9176_c0_g1 TRINITY_DN1907_c0_g4 |
| Carbohydrate digestion and absorption                                 | map04973 | 4/85  | 0.001   | TRINITY_DN209_c1_g1 TRINITY_DN6325_c0_g1 TRINITY_DN9176_c0_g1<br> TRINITY_DN1907_c0_g4                                                                                           |
| Nitrogen metabolism                                                   | map00910 | 3/85  | 0.002   | TRINITY_DN1777_c0_g1 TRINITY_DN6383_c0_g1 TRINITY_DN1172_c0_g1                                                                                                                   |
| Pancreatic secretion                                                  | map04972 | 6/85  | 0.004   | TRINITY_DN6325_c0_g1 TRINITY_DN32432_c0_g1 TRINITY_DN1932_c0_g1<br> TRINITY_DN1172_c0_g1 TRINITY_DN5032_c0_g1 TRINITY_DN1907_c0_g4                                               |
| Galactose metabolism                                                  | map00052 | 3/85  | 0.006   | TRINITY_DN1721_c0_g1 TRINITY_DN209_c1_g1 TRINITY_DN9176_c0_g1                                                                                                                    |
| RIG-I-like receptor signaling pathway                                 | map04622 | 2/85  | 0.022   | TRINITY_DN37493_c0_g1 TRINITY_DN11882_c0_g1                                                                                                                                      |
| Protein digestion and absorption                                      | map04974 | 4/85  | 0.020   | TRINITY_DN32432_c0_g1 TRINITY_DN3909_c0_g1 TRINITY_DN5032_c0_g1<br> TRINITY_DN6158_c0_g1                                                                                         |
| Th1 and Th2 cell differentiation                                      | map04658 | 2/85  | 0.026   | TRINITY_DN8309_c0_g1 TRINITY_DN1716_c0_g1                                                                                                                                        |
| Proximal tubule bicarbonate reclamation                               | map04964 | 2/85  | 0.020   | TRINITY_DN6383_c0_g1 TRINITY_DN1172_c0_g1                                                                                                                                        |
| Lysosome                                                              | map04142 | 5/85  | 0.038   | TRINITY_DN1721_c0_g1 TRINITY_DN581_c0_g1 TRINITY_DN632_c0_g1<br> TRINITY_DN3387_c0_g1 TRINITY_DN2042_c0_g1                                                                       |
| 0.1%/Control                                                          |          |       |         |                                                                                                                                                                                  |
| Fructose and mannose metabolism                                       | map00051 | 2/35  | 0.015   | TRINITY_DN11882_c0_g1 TRINITY_DN27888_c0_g1                                                                                                                                      |
| Longevity regulating pathway - multiple species                       | map04213 | 2/35  | 0.032   | TRINITY_DN18184_c0_g4 TRINITY_DN12488_c0_g1                                                                                                                                      |
| Starch and sucrose metabolism                                         | map00500 | 2/35  | 0.030   | TRINITY_DN16841_c0_g1 TRINITY_DN209_c1_g1                                                                                                                                        |
| Insulin resistance                                                    | map04931 | 2/35  | 0.026   | TRINITY_DN6609_c0_g1 TRINITY_DN10885_c0_g2                                                                                                                                       |
| Glycosaminoglycan biosynthesis - chondroitin sulfate/dermatan sulfate | map00532 | 2/35  | 0.009   | TRINITY_DN3972_c0_g1 TRINITY_DN15725_c0_g1                                                                                                                                       |

|                                                         |          |        |       |                                                                                                                                                                                                                                                                                                                                                                                              |
|---------------------------------------------------------|----------|--------|-------|----------------------------------------------------------------------------------------------------------------------------------------------------------------------------------------------------------------------------------------------------------------------------------------------------------------------------------------------------------------------------------------------|
| Cell adhesion molecules                                 | map04514 | 2/35   | 0.014 | TRINITY_DN6609_c0_g1 TRINITY_DN10885_c0_g2                                                                                                                                                                                                                                                                                                                                                   |
| Pancreatic secretion                                    | map04972 | 3/35   | 0.023 | TRINITY_DN1932_c0_g1 TRINITY_DN5032_c0_g1 TRINITY_DN7892_c0_g1                                                                                                                                                                                                                                                                                                                               |
| PPAR signaling pathway                                  | map03320 | 3/35   | 0.007 | TRINITY_DN2597_c0_g1 TRINITY_DN7925_c1_g1 TRINITY_DN14357_c0_g1                                                                                                                                                                                                                                                                                                                              |
| 0.2%/Control                                            |          |        |       |                                                                                                                                                                                                                                                                                                                                                                                              |
| JAK-STAT signaling pathway                              | map04630 | 7/343  | 0.000 | TRINITY_DN6518_c0_g2 TRINITY_DN2726_c0_g1 TRINITY_DN9466_c0_g1<br> TRINITY_DN20840_c0_g2 TRINITY_DN10656_c0_g1 TRINITY_DN20318_c0_g1<br> TRINITY_DN9403_c0_g1                                                                                                                                                                                                                                |
| Prolactin signaling pathway                             | map04917 | 5/343  | 0.005 | TRINITY_DN20318_c0_g1 TRINITY_DN10656_c0_g1 TRINITY_DN1256_c0_g1<br> TRINITY_DN9466_c0_g1 TRINITY_DN9403_c0_g1                                                                                                                                                                                                                                                                               |
| Hippo signaling pathway -<br>multiple species           | map04392 | 4/343  | 0.008 | TRINITY_DN14606_c1_g1 TRINITY_DN35828_c0_g1 TRINITY_DN7883_c0_g1<br> TRINITY_DN9150_c0_g1                                                                                                                                                                                                                                                                                                    |
| Neurotrophin signaling pathway                          | map04722 | 6/343  | 0.029 | TRINITY_DN19143_c0_g1 TRINITY_DN8077_c0_g1 TRINITY_DN1256_c0_g1<br> TRINITY_DN15479_c0_g1 TRINITY_DN10656_c0_g1 TRINITY_DN18614_c0_g2<br>TRINITY_DN6518_c0_g2 TRINITY_DN8314_c0_g1 TRINITY_DN1246_c0_g1<br> TRINITY_DN3685_c0_g1 TRINITY_DN3739_c0_g1 TRINITY_DN1306_c1_g1<br> TRINITY_DN9403_c0_g1 TRINITY_DN555_c0_g1 TRINITY_DN15479_c0_g1<br> TRINITY_DN6609_c0_g1 TRINITY_DN20840_c0_g2 |
| MicroRNAs in cancer                                     | map05206 | 11/343 | 0.019 | TRINITY_DN10656_c0_g1 TRINITY_DN6518_c0_g2 TRINITY_DN1813_c0_g1<br> TRINITY_DN20840_c0_g2                                                                                                                                                                                                                                                                                                    |
| Acute myeloid leukemia                                  | map05221 | 4/343  | 0.021 | TRINITY_DN3739_c0_g1 TRINITY_DN4855_c0_g2 TRINITY_DN20840_c0_g2<br> TRINITY_DN15479_c0_g1 TRINITY_DN10656_c0_g1 TRINITY_DN9030_c0_g3<br>TRINITY_DN555_c0_g1 TRINITY_DN10650_c0_g3 TRINITY_DN1306_c1_g1<br> TRINITY_DN4735_c1_g1                                                                                                                                                              |
| AGE-RAGE signaling pathway in<br>diabetic complications | map04933 | 6/343  | 0.026 | TRINITY_DN8314_c0_g1 TRINITY_DN1256_c0_g1 TRINITY_DN841_c0_g1<br> TRINITY_DN12252_c0_g1 TRINITY_DN10656_c0_g1 TRINITY_DN143_c0_g1<br> TRINITY_DN38868_c1_g2                                                                                                                                                                                                                                  |
| ABC transporters                                        | map02010 | 4/343  | 0.028 | TRINITY_DN8168_c0_g1 TRINITY_DN162_c0_g2                                                                                                                                                                                                                                                                                                                                                     |
| AMPK signaling pathway                                  | map04152 | 7/343  | 0.042 |                                                                                                                                                                                                                                                                                                                                                                                              |
| Circadian rhythm - fly                                  | map04711 | 2/343  | 0.043 |                                                                                                                                                                                                                                                                                                                                                                                              |
| 0.4%/Control                                            |          |        |       |                                                                                                                                                                                                                                                                                                                                                                                              |

|                                      |          |        |       |                                                                                                                                                                                                                                                                                                                                                                                              |
|--------------------------------------|----------|--------|-------|----------------------------------------------------------------------------------------------------------------------------------------------------------------------------------------------------------------------------------------------------------------------------------------------------------------------------------------------------------------------------------------------|
| Prolactin signaling pathway          | map04917 | 7/566  | 0.002 | TRINITY_DN11337_c0_g1 TRINITY_DN1256_c0_g1 TRINITY_DN9466_c0_g1<br> TRINITY_DN9403_c0_g1 TRINITY_DN1918_c0_g2 TRINITY_DN10656_c0_g1<br> TRINITY_DN10208_c0_g1                                                                                                                                                                                                                                |
| Acute myeloid leukemia               | map05221 | 7/566  | 0.001 | TRINITY_DN6518_c0_g2 TRINITY_DN6648_c0_g1 TRINITY_DN20840_c0_g2<br> TRINITY_DN1918_c0_g2 TRINITY_DN1813_c0_g1 TRINITY_DN10656_c0_g1<br> TRINITY_DN10208_c0_g1                                                                                                                                                                                                                                |
| JAK-STAT signaling pathway           | map04630 | 8/566  | 0.002 | TRINITY_DN6518_c0_g2 TRINITY_DN6648_c0_g1 TRINITY_DN2726_c0_g1<br> TRINITY_DN9466_c0_g1 TRINITY_DN9403_c0_g1 TRINITY_DN10656_c0_g1<br> TRINITY_DN4861_c0_g1 TRINITY_DN20840_c0_g2                                                                                                                                                                                                            |
| Spinocerebellar ataxia               | map05017 | 10/566 | 0.004 | TRINITY_DN11337_c0_g1 TRINITY_DN7604_c0_g1 TRINITY_DN6648_c0_g1<br> TRINITY_DN8077_c0_g1 TRINITY_DN8091_c0_g1 TRINITY_DN9320_c0_g1<br> TRINITY_DN5840_c0_g1 TRINITY_DN10656_c0_g1 TRINITY_DN1716_c0_g3<br> TRINITY_DN1716_c0_g1                                                                                                                                                              |
| MicroRNAs in cancer                  | map05206 | 17/566 | 0.007 | TRINITY_DN16089_c0_g2 TRINITY_DN6518_c0_g2 TRINITY_DN8314_c0_g1<br> TRINITY_DN1246_c0_g1 TRINITY_DN3685_c0_g1 TRINITY_DN6648_c0_g1<br> TRINITY_DN1306_c1_g1 TRINITY_DN9403_c0_g1 TRINITY_DN1918_c0_g2<br> TRINITY_DN20840_c0_g2 TRINITY_DN1122_c0_g1 TRINITY_DN5482_c0_g3<br> TRINITY_DN10208_c0_g1 TRINITY_DN6609_c0_g1 TRINITY_DN5890_c0_g1<br> TRINITY_DN12178_c0_g2 TRINITY_DN5750_c1_g3 |
| Hepatitis B                          | map05161 | 11/566 | 0.016 | TRINITY_DN11337_c0_g1 TRINITY_DN271_c1_g1 TRINITY_DN9030_c0_g3<br> TRINITY_DN6518_c0_g2 TRINITY_DN19143_c0_g1 TRINITY_DN1918_c0_g2<br> TRINITY_DN7502_c0_g1 TRINITY_DN2018_c0_g1 TRINITY_DN10656_c0_g1<br> TRINITY_DN10208_c0_g1 TRINITY_DN5890_c0_g1                                                                                                                                        |
| Toll-like receptor signaling pathway | map04620 | 6/566  | 0.016 | TRINITY_DN11337_c0_g1 TRINITY_DN1918_c0_g2 TRINITY_DN7502_c0_g1<br> TRINITY_DN271_c1_g1 TRINITY_DN10656_c0_g1 TRINITY_DN10208_c0_g1                                                                                                                                                                                                                                                          |
| Th1 and Th2 cell differentiation     | map04658 | 7/566  | 0.001 | TRINITY_DN11337_c0_g1 TRINITY_DN3685_c0_g1 TRINITY_DN1918_c0_g2<br> TRINITY_DN5750_c1_g3 TRINITY_DN10208_c0_g1 TRINITY_DN1716_c0_g1<br> TRINITY_DN8309_c0_g1                                                                                                                                                                                                                                 |

|                                                          |          |        |       |                                                                                                                                                                                                                                                                                                                            |
|----------------------------------------------------------|----------|--------|-------|----------------------------------------------------------------------------------------------------------------------------------------------------------------------------------------------------------------------------------------------------------------------------------------------------------------------------|
| Autophagy - animal                                       | map04140 | 14/566 | 0.006 | TRINITY_DN8020_c0_g1 TRINITY_DN7604_c0_g1 TRINITY_DN11337_c0_g1<br> TRINITY_DN6648_c0_g1 TRINITY_DN28994_c0_g3 TRINITY_DN8314_c0_g1<br> TRINITY_DN2957_c0_g1 TRINITY_DN2676_c0_g1 TRINITY_DN8091_c0_g1<br> TRINITY_DN9320_c0_g1 TRINITY_DN10208_c0_g1 TRINITY_DN5840_c0_g1<br> TRINITY_DN10656_c0_g1 TRINITY_DN15542_c0_g1 |
| B-cell receptor signaling pathway                        | map04662 | 6/566  | 0.007 | TRINITY_DN3812_c0_g1 TRINITY_DN11405_c0_g1 TRINITY_DN4390_c0_g2<br> TRINITY_DN1918_c0_g2 TRINITY_DN10656_c0_g1 TRINITY_DN10208_c0_g1                                                                                                                                                                                       |
| RIG-I-like receptor signaling pathway                    | map04622 | 5/566  | 0.015 | TRINITY_DN37493_c0_g1 TRINITY_DN11337_c0_g1 TRINITY_DN1918_c0_g2<br> TRINITY_DN19143_c0_g1 TRINITY_DN7502_c0_g1                                                                                                                                                                                                            |
| Th17-cell differentiation                                | map04659 | 6/566  | 0.019 | TRINITY_DN11337_c0_g1 TRINITY_DN6648_c0_g1 TRINITY_DN3236_c0_g1<br> TRINITY_DN1918_c0_g2 TRINITY_DN10208_c0_g1 TRINITY_DN9030_c0_g3<br>TRINITY_DN11337_c0_g1 TRINITY_DN271_c1_g1 TRINITY_DN1918_c0_g2                                                                                                                      |
| TNF signaling pathway                                    | map04668 | 9/566  | 0.020 | TRINITY_DN8077_c0_g1 TRINITY_DN7502_c0_g1 TRINITY_DN10656_c0_g1<br> TRINITY_DN10208_c0_g1 TRINITY_DN5890_c0_g1 TRINITY_DN6900_c0_g1<br>TRINITY_DN11337_c0_g1 TRINITY_DN1737_c0_g1 TRINITY_DN8314_c0_g1<br> TRINITY_DN2776_c0_g1 TRINITY_DN6648_c0_g1 TRINITY_DN1187_c0_g1                                                  |
| Insulin signaling pathway                                | map04910 | 12/566 | 0.015 | TRINITY_DN12252_c0_g1 TRINITY_DN10656_c0_g1 TRINITY_DN10208_c0_g1<br> TRINITY_DN6609_c0_g1 TRINITY_DN4193_c0_g1 TRINITY_DN10885_c0_g2<br>TRINITY_DN6518_c0_g2 TRINITY_DN3591_c0_g1 TRINITY_DN2551_c0_g1                                                                                                                    |
| Signaling pathways regulating pluripotency of stem cells | map04550 | 8/566  | 0.013 | TRINITY_DN10656_c0_g1 TRINITY_DN10208_c0_g1 TRINITY_DN10085_c0_g3<br> TRINITY_DN17933_c0_g1 TRINITY_DN16089_c0_g2                                                                                                                                                                                                          |
| Longevity regulating pathway                             | map04211 | 8/566  | 0.013 | TRINITY_DN8020_c0_g1 TRINITY_DN8314_c0_g1 TRINITY_DN1256_c0_g1<br> TRINITY_DN1918_c0_g2 TRINITY_DN9320_c0_g1 TRINITY_DN5840_c0_g1<br> TRINITY_DN10656_c0_g1 TRINITY_DN6648_c0_g1                                                                                                                                           |
| Hippo signaling pathway - multiple species               | map04392 | 5/566  | 0.009 | TRINITY_DN14606_c1_g1 TRINITY_DN35828_c0_g1 TRINITY_DN7883_c0_g1<br> TRINITY_DN12964_c0_g1 TRINITY_DN4152_c0_g1                                                                                                                                                                                                            |
| Starch and sucrose metabolism                            | map00500 | 10/566 | 0.010 | TRINITY_DN6325_c0_g1 TRINITY_DN29293_c0_g1 TRINITY_DN16841_c0_g1<br> TRINITY_DN209_c1_g1 TRINITY_DN12252_c0_g1 TRINITY_DN1721_c0_g1<br> TRINITY_DN9176_c0_g1 TRINITY_DN4187_c0_g1 TRINITY_DN8367_c0_g2<br> TRINITY_DN1737_c0_g1                                                                                            |

|                                                                          |          |        |       |                                                                                                                                                                                                                                                                                                                              |
|--------------------------------------------------------------------------|----------|--------|-------|------------------------------------------------------------------------------------------------------------------------------------------------------------------------------------------------------------------------------------------------------------------------------------------------------------------------------|
| Endocrine resistance                                                     | map01522 | 8/566  | 0.012 | TRINITY_DN11337_c0_g1 TRINITY_DN5064_c0_g1 TRINITY_DN6648_c0_g1<br> TRINITY_DN3685_c0_g1 TRINITY_DN5750_c1_g3 TRINITY_DN10656_c0_g1<br> TRINITY_DN10208_c0_g1 TRINITY_DN8309_c0_g1                                                                                                                                           |
| Osteoclast differentiation                                               | map04380 | 6/566  | 0.013 | TRINITY_DN11337_c0_g1 TRINITY_DN11405_c0_g1 TRINITY_DN1918_c0_g2<br> TRINITY_DN10656_c0_g1 TRINITY_DN10208_c0_g1 TRINITY_DN9030_c0_g3                                                                                                                                                                                        |
| Glycosaminoglycan biosynthesis -<br>chondroitin sulfate/dermatan sulfate | map00532 | 6/566  | 0.026 | TRINITY_DN5242_c0_g1 TRINITY_DN24399_c0_g1 TRINITY_DN10467_c0_g1<br> TRINITY_DN3972_c0_g1 TRINITY_DN371_c0_g1 TRINITY_DN1291_c0_g1                                                                                                                                                                                           |
| T-cell receptor signaling pathway                                        | map04660 | 6/566  | 0.036 | TRINITY_DN11337_c0_g1 TRINITY_DN3812_c0_g1 TRINITY_DN4390_c0_g2<br> TRINITY_DN1918_c0_g2 TRINITY_DN10656_c0_g1 TRINITY_DN10208_c0_g1<br>TRINITY_DN11337_c0_g1 TRINITY_DN1918_c0_g2 TRINITY_DN8077_c0_g1<br> TRINITY_DN11513_c0_g1 TRINITY_DN27382_c0_g1 TRINITY_DN521_c0_g2                                                  |
| Sphingolipid signaling pathway                                           | map04071 | 10/566 | 0.042 | TRINITY_DN10656_c0_g1 TRINITY_DN10208_c0_g1 TRINITY_DN27926_c0_g1<br> TRINITY_DN5802_c0_g1<br>TRINITY_DN34912_c0_g7 TRINITY_DN30140_c0_g1 TRINITY_DN2042_c0_g1<br> TRINITY_DN6495_c1_g1 TRINITY_DN5555_c0_g1 TRINITY_DN41_c0_g1<br> TRINITY_DN1173_c0_g1                                                                     |
| Cholesterol metabolism                                                   | map04979 | 7/566  | 0.031 | TRINITY_DN11337_c0_g1 TRINITY_DN271_c1_g1 TRINITY_DN7502_c0_g1<br> TRINITY_DN1918_c0_g2 TRINITY_DN10656_c0_g1 TRINITY_DN10208_c0_g1<br> TRINITY_DN9030_c0_g3                                                                                                                                                                 |
| Chagas disease                                                           | map05142 | 7/566  | 0.031 | TRINITY_DN11337_c0_g1 TRINITY_DN19143_c0_g1 TRINITY_DN8077_c0_g1<br> TRINITY_DN1256_c0_g1 TRINITY_DN1187_c0_g1 TRINITY_DN1918_c0_g2<br> TRINITY_DN10656_c0_g1 TRINITY_DN10208_c0_g1                                                                                                                                          |
| Neurotrophin signaling pathway                                           | map04722 | 8/566  | 0.037 | TRINITY_DN11337_c0_g1 TRINITY_DN10208_c0_g1 TRINITY_DN1737_c0_g1<br> TRINITY_DN6648_c0_g1<br>TRINITY_DN11337_c0_g1 TRINITY_DN271_c1_g1 TRINITY_DN6518_c0_g2<br> TRINITY_DN6648_c0_g1 TRINITY_DN7502_c0_g1 TRINITY_DN8091_c0_g1<br> TRINITY_DN1918_c0_g2 TRINITY_DN10656_c0_g1 TRINITY_DN10208_c0_g1<br> TRINITY_DN5890_c0_g1 |
| Type II diabetes mellitus                                                | map04930 | 4/566  | 0.028 | TRINITY_DN10656_c0_g1 TRINITY_DN11337_c0_g1 TRINITY_DN4390_c0_g2<br> TRINITY_DN10208_c0_g1 TRINITY_DN271_c1_g1                                                                                                                                                                                                               |
| Kaposi sarcoma-associated<br>herpesvirus infection                       | map05167 | 10/566 | 0.035 |                                                                                                                                                                                                                                                                                                                              |
| Fc epsilon RI signaling pathway                                          | map04664 | 5/566  | 0.034 |                                                                                                                                                                                                                                                                                                                              |



|                                                  |          |        |       |                                                                                                                                                                                                                       |
|--------------------------------------------------|----------|--------|-------|-----------------------------------------------------------------------------------------------------------------------------------------------------------------------------------------------------------------------|
| Carbohydrate digestion and absorption            | map04973 | 6/566  | 0.041 | TRINITY_DN6325_c0_g1 TRINITY_DN1737_c0_g1 TRINITY_DN209_c1_g1 TRINITY_DN10656_c0_g1 TRINITY_DN9176_c0_g1 TRINITY_DN8367_c0_g2                                                                                         |
| Dorso-ventral axis formation                     | map04320 | 6/566  | 0.041 | TRINITY_DN16218_c0_g1 TRINITY_DN3685_c0_g1 TRINITY_DN7144_c0_g1 TRINITY_DN5750_c1_g3 TRINITY_DN10208_c0_g1 TRINITY_DN91_c0_g1                                                                                         |
| Breast cancer                                    | map05224 | 8/566  | 0.046 | TRINITY_DN6518_c0_g2 TRINITY_DN6648_c0_g1 TRINITY_DN3685_c0_g1 TRINITY_DN5750_c1_g3 TRINITY_DN2551_c0_g1 TRINITY_DN10656_c0_g1 TRINITY_DN10208_c0_g1 TRINITY_DN8309_c0_g1                                             |
| Glycosaminoglycan biosynthesis - keratan sulfate | map00533 | 3/566  | 0.031 | TRINITY_DN371_c0_g1 TRINITY_DN24399_c0_g1 TRINITY_DN10467_c0_g1                                                                                                                                                       |
| ABC transporters                                 | map02010 | 5/566  | 0.040 | TRINITY_DN5294_c0_g1 TRINITY_DN10764_c0_g1 TRINITY_DN10650_c0_g3 TRINITY_DN1306_c1_g1 TRINITY_DN4735_c1_g1                                                                                                            |
| Cushing syndrome                                 | map04934 | 10/566 | 0.046 | TRINITY_DN1311_c0_g1 TRINITY_DN16940_c0_g9 TRINITY_DN23062_c0_g6 TRINITY_DN6472_c0_g1 TRINITY_DN23062_c0_g3 TRINITY_DN6495_c1_g1 TRINITY_DN10208_c0_g1 TRINITY_DN1637_c0_g1 TRINITY_DN2551_c0_g1 TRINITY_DN8192_c0_g1 |

---
